# Supplementary material
Source: PubMed Central journal article supplement (PMC2656285)
Supplement: NIHMS92694-supplement-SupFig1.pdf [file NIHMS92694-supplement-SupFig1.pdf]

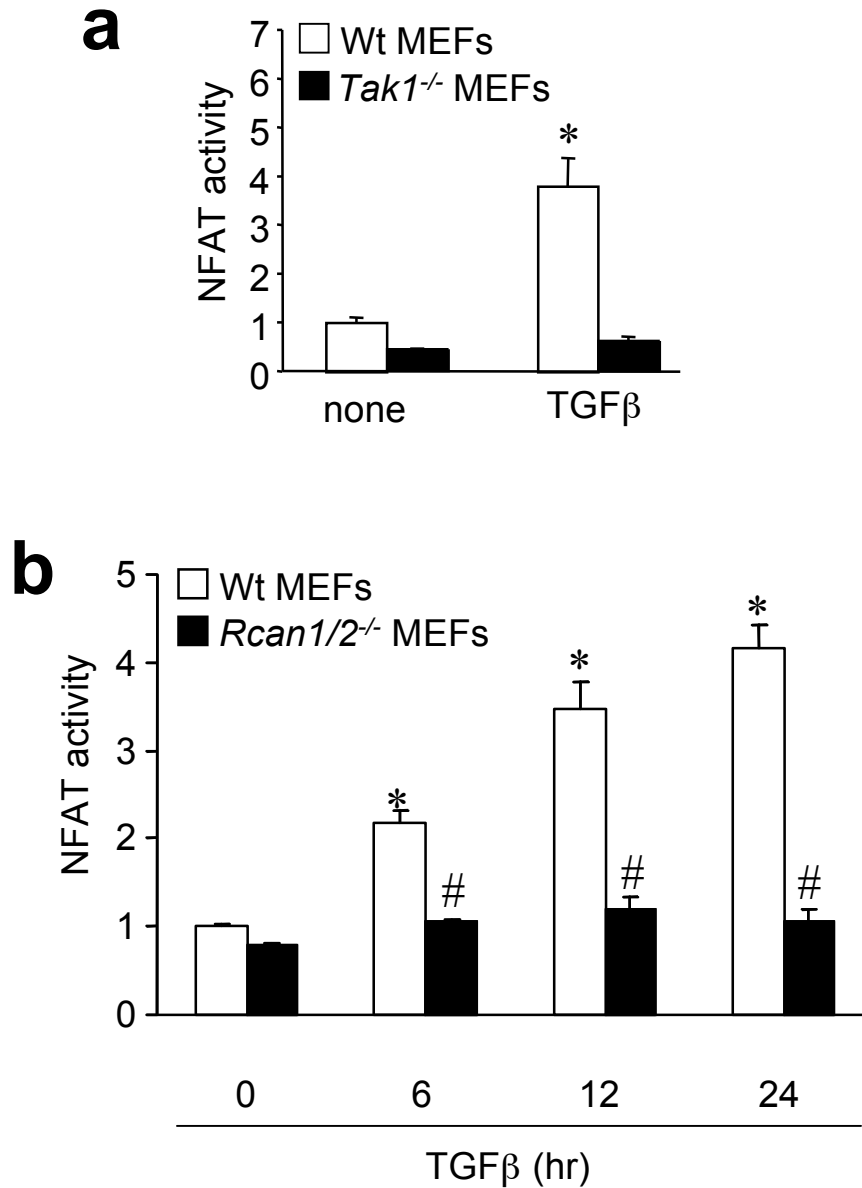

**Figure S1.** (a) Wt and *Tak1* null MEFs stimulated with TGFβ for 24 hrs or no stimulation (none). Cells were infected prior with the NFAT-luciferase adenovirus.  $P < 0.05$  versus none. (b) Dose response of TGFβ-activated NFAT luciferase reporter activity in wildtype or *Rcan1/2*<sup>-/-</sup> MEFs for the indicated hours. MEFs were cultured overnight in serum-free media before TGFβ stimulation. Cultures were also infected with an NFAT-luciferase reporter adenovirus before hand. # $P < 0.05$  versus Wt MEFs; \* $P < 0.05$  versus 0 stimulation.
