# Supplementary material
Source: PubMed Central journal article supplement (PMC2656285)
Supplement: NIHMS92694-supplement-SupFig2.pdf [file NIHMS92694-supplement-SupFig2.pdf]

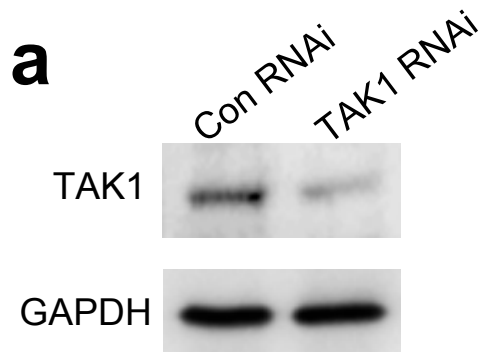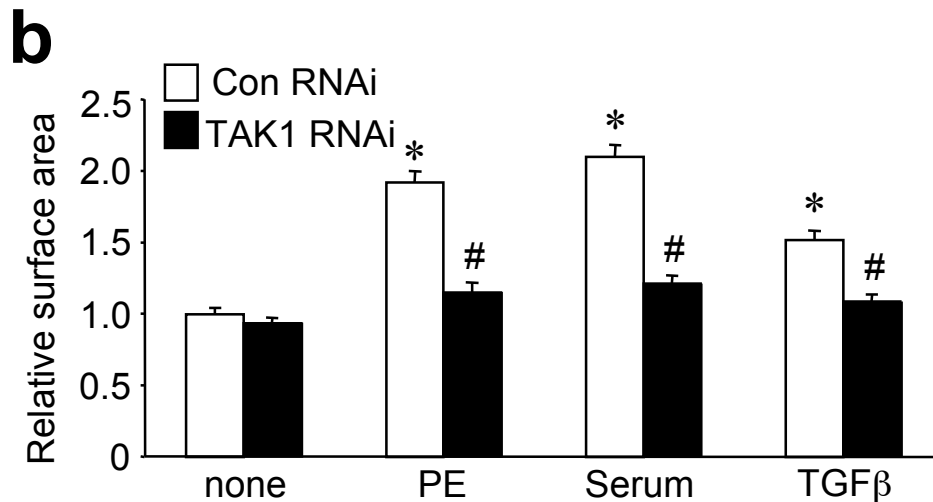

**Figure S2.** (a) Transfection of control or TAK1 RNAi in neonatal rat cardiomyocytes in culture for 48 hrs followed by Western blotting for TAK1 or GAPDH protein. TAK1 RNAi reduced endogenous TAK1 by 60-70% (b) Quantitation of cardiomyocyte surface areas to assess hypertrophy with control or TAK1 RNAi following by stimulation with the indicated hypertrophic agonists. TAK1 RNAi inhibited agonist-induced hypertrophy over 48 hrs. \*P<0.05; #P<0.05 versus control RNAi for each agonist. The sequences of the TAK1 RNAi is: 5' GCAACAGAGUGAAUCUGGACGUUUA-3'. It was from Invitrogen (TAK1, Cat # 12936-29; control RNAi, Cat #12935-200).
