# Supplementary material
Source: PubMed Central journal article supplement (PMC2656285)
Supplement: NIHMS92694-supplement-SupFig3.pdf [file NIHMS92694-supplement-SupFig3.pdf]

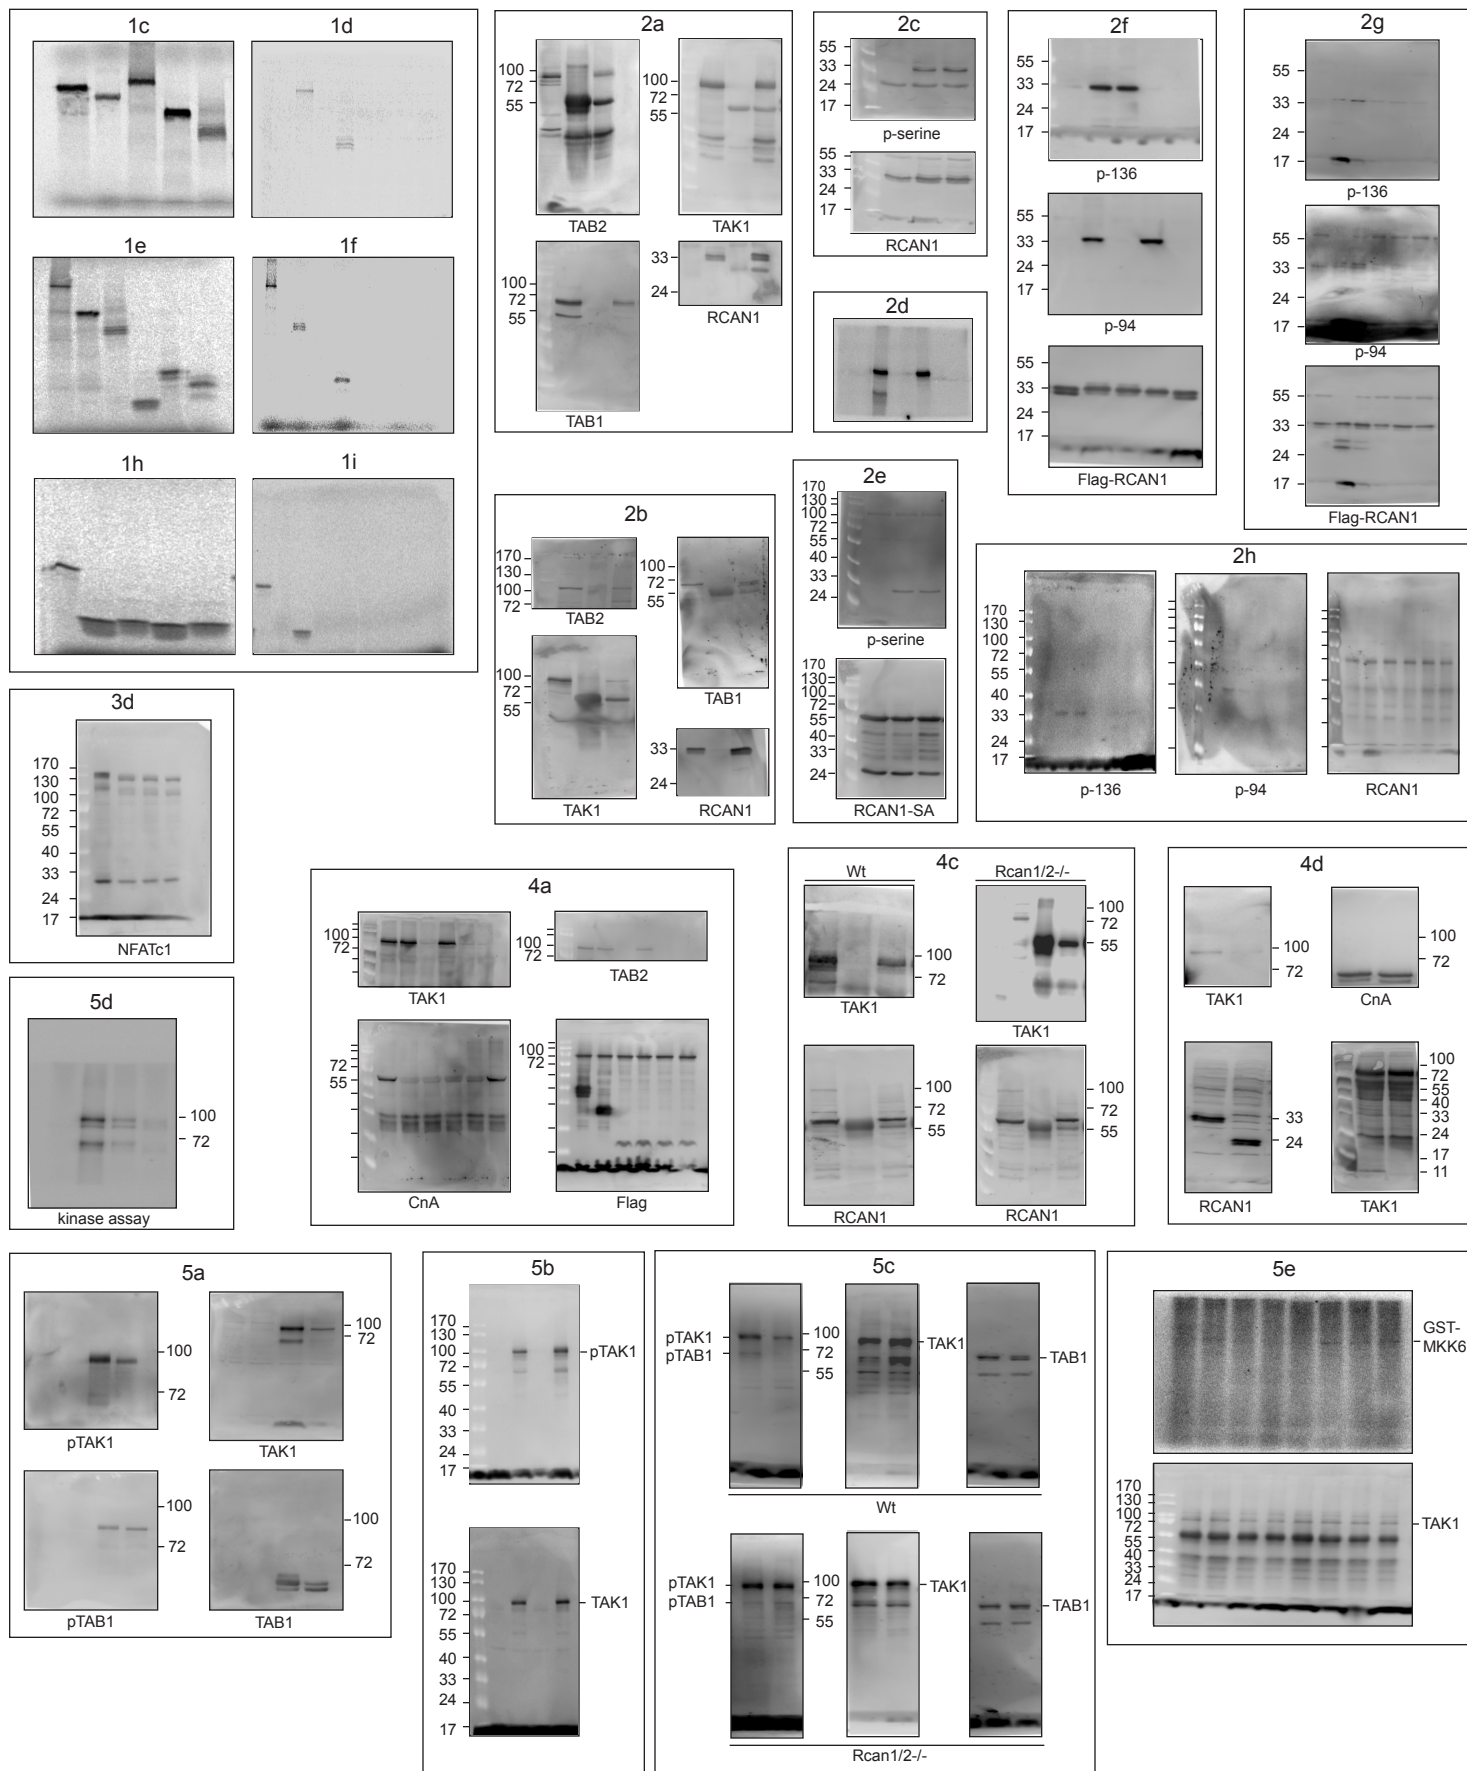

**Figure S3** Full scans of gel/western data of key panels from Figures 1-5. Some full sized membranes were cut prior to immunoblotting.
